# Supplementary material for: Static and Dynamic Cognitive Deficits in Childhood Preceding Adult Schizophrenia: A 30-Year Study
Source: Atypon-hosted journal article supplement (doi:10.1176/appi.ajp.2009.09040574), 2010-01-04
Supplement: ajp_167_02_160_01.pdf [file ajp_167_02_160_01.pdf]

**Supplemental Table:** Mental age scores by assessment age (Mean and Standard Deviation) among future schizophrenia cases, recurrent depression cases, and healthy controls (Corresponding to data presented in Figure 3, Figure 4, and Figure 5).

| Scale / Age         | Healthy Controls<br>(N=556) |      | Schizophrenia<br>(N=35) |      | Recurrent Depression<br>(N=145) |      |
|---------------------|-----------------------------|------|-------------------------|------|---------------------------------|------|
|                     | Mean                        | SD   | Mean                    | SD   | Mean                            | SD   |
| <b>Information</b>  |                             |      |                         |      |                                 |      |
| 7 years             | 7.59                        | 1.17 | 7.17                    | 1.14 | 7.43                            | 1.24 |
| 9 years             | 9.63                        | 1.67 | 9.27                    | 1.69 | 9.36                            | 1.56 |
| 11 years            | 11.79                       | 2.39 | 11.47                   | 2.89 | 11.35                           | 2.45 |
| 13 years            | 13.94                       | 3.04 | 13.66                   | 3.12 | 13.42                           | 3.23 |
| <b>Similarities</b> |                             |      |                         |      |                                 |      |
| 7 years             | 7.58                        | 1.70 | 6.86                    | 2.10 | 7.39                            | 1.58 |
| 9 years             | 10.24                       | 2.69 | 9.21                    | 2.64 | 10.04                           | 2.77 |
| 11 years            | 13.18                       | 3.35 | 12.85                   | 4.02 | 12.63                           | 3.60 |
| 13 years            | 15.11                       | 3.18 | 14.26                   | 3.76 | 14.79                           | 3.45 |
| <b>Vocabulary</b>   |                             |      |                         |      |                                 |      |
| 7 years             | 7.99                        | 1.17 | 7.68                    | 1.28 | 7.80                            | 1.31 |
| 9 years             | 9.89                        | 1.59 | 9.11                    | 1.46 | 9.68                            | 1.74 |
| 11 years            | 11.90                       | 2.02 | 11.63                   | 2.39 | 11.71                           | 2.18 |
| 13 years            | 13.65                       | 2.59 | 12.91                   | 2.38 | 13.56                           | 2.85 |
| <b>Block Design</b> |                             |      |                         |      |                                 |      |
| 7 years             | 8.20                        | 1.85 | 8.18                    | 2.00 | 7.85                            | 1.71 |
| 9 years             | 10.86                       | 2.73 | 9.79                    | 2.95 | 10.45                           | 2.65 |

|          |       |      |       |      |       |      |
|----------|-------|------|-------|------|-------|------|
| 11 years | 13.58 | 3.29 | 12.66 | 3.41 | 13.15 | 2.85 |
| 13 years | 15.68 | 3.42 | 13.69 | 4.00 | 15.47 | 3.49 |

**Object Assembly**

|          |       |      |       |      |       |      |
|----------|-------|------|-------|------|-------|------|
| 7 years  | 8.36  | 2.10 | 8.16  | 2.10 | 7.95  | 1.89 |
| 9 years  | 11.32 | 3.26 | 10.35 | 3.21 | 11.03 | 3.20 |
| 11 years | 14.54 | 3.78 | 12.92 | 4.24 | 14.09 | 3.87 |
| 13 years | 17.30 | 4.02 | 16.46 | 4.61 | 16.84 | 4.19 |

**Picture Completion**

|          |       |      |       |      |       |      |
|----------|-------|------|-------|------|-------|------|
| 7 years  | 8.38  | 1.81 | 7.67  | 1.77 | 8.10  | 1.70 |
| 9 years  | 10.52 | 2.30 | 9.54  | 2.75 | 10.18 | 2.28 |
| 11 years | 12.95 | 2.76 | 12.51 | 2.37 | 12.70 | 2.77 |
| 13 years | 15.02 | 2.96 | 14.19 | 3.32 | 14.81 | 2.95 |

**Arithmetic**

|          |       |      |       |      |       |      |
|----------|-------|------|-------|------|-------|------|
| 7 years  | 7.21  | 0.73 | 6.84  | 0.56 | 7.04  | 0.68 |
| 9 years  | 9.46  | 1.96 | 8.80  | 2.29 | 9.18  | 1.74 |
| 11 years | 12.27 | 2.95 | 10.92 | 2.76 | 11.51 | 2.89 |
| 13 years | 14.70 | 3.54 | 12.78 | 2.61 | 13.80 | 3.32 |

**Digit Symbol**

|          |       |      |       |      |       |      |
|----------|-------|------|-------|------|-------|------|
| 7 years  | 7.31  | 1.17 | 7.27  | 1.35 | 7.27  | 1.19 |
| 9 years  | 8.74  | 1.47 | 8.60  | 1.89 | 8.77  | 1.51 |
| 11 years | 11.24 | 1.93 | 10.47 | 1.91 | 11.40 | 2.12 |
| 13 years | 13.47 | 2.77 | 12.45 | 2.97 | 13.85 | 3.05 |

---
